# Supplementary material for: Exploring the Multifaceted Potential of a Peptide Fraction Derived from Saccharomyces cerevisiae Metabolism: Antimicrobial, Antioxidant, Antidiabetic, and Anti-Inflammatory Properties
Source: MDPI journal article supplement (doi:10.3390/antibiotics12081332), 2023-08-18
Supplement: s1 [file s1]

## Supplementary material

# Exploring the Multifaceted Potential of a Peptide Fraction Derived from *Saccharomyces cerevisiae* Metabolism: Antimicrobial, Antioxidant, Antidiabetic, and Anti-Inflammatory Properties

Patrícia Branco <sup>1,2,3,\*</sup>, Elisabete Muchagato Maurício <sup>1,4,5,\*</sup>, Ana Costa <sup>2</sup>, Diogo Ventura <sup>2</sup>, Catarina Roma-Rodrigues <sup>6,7</sup>, Maria Paula Duarte <sup>8</sup>, Alexandra R. Fernandes <sup>6,7</sup> and Catarina Prista <sup>2</sup>

<sup>1</sup> School of Engineering, Lusófona University, Campo Grande 376, 1749-024 Lisboa, Portugal

<sup>2</sup> Linking Landscape, Environment, Agriculture and Food (LEAF), Associated Laboratory TERRA, Instituto Superior de Agronomia, University of Lisbon, Tapada da Ajuda, 1349-017 Lisboa, Portugal; acs.costa@fct.unl.pt (A.C.); isa126000@isa.ulisboa.pt (D.V.); cprista@isa.utl.pt (C.P.)

<sup>3</sup> Unit of Bioenergy and Biorefinary, Laboratório Nacional de Energia e Geologia (LNEG), Estrada do Paço do Lumiar, 22, 1649-038 Lisboa, Portugal

<sup>4</sup> CBIOS—Universidade Lusófona's Research Center for Biosciences & Health Technologies, Campo Grande 376, 1749-024 Lisboa, Portugal

<sup>5</sup> Elisa Câmara, Lda, Dermocosmética, Centro Empresarial de Talaíde, n.º 7 e 8, 2785-723 São Domingos de Rana, Portugal

<sup>6</sup> UCIBIO—Applied Molecular Biosciences Unit, Department Ciências da Vida, NOVA School of Science and Technology, 2829-516 Caparica, Portugal; catromar@fct.unl.pt (C.R.-R.); ma.fernandes@fct.unl.pt (A.R.F.)

<sup>7</sup> i4HB, Associate Laboratory—Institute for Health and Bioeconomy, Faculdade de Ciências e Tecnologia, Universidade NOVA de Lisboa, 2829-516 Caparica, Portugal

<sup>8</sup> MEtRICs, Departamento de Química, NOVA School of Science and Technology | FCTNOVA, Campus de Caparica, Universidade Nova de Lisboa, 2829-516 Caparica, Portugal; mpcd@fct.unl.pt

\* Correspondence: patricia.branco@ulusofona.pt (P.B.); elisabete.mauricio@ulusofona.pt (E.M.M.)

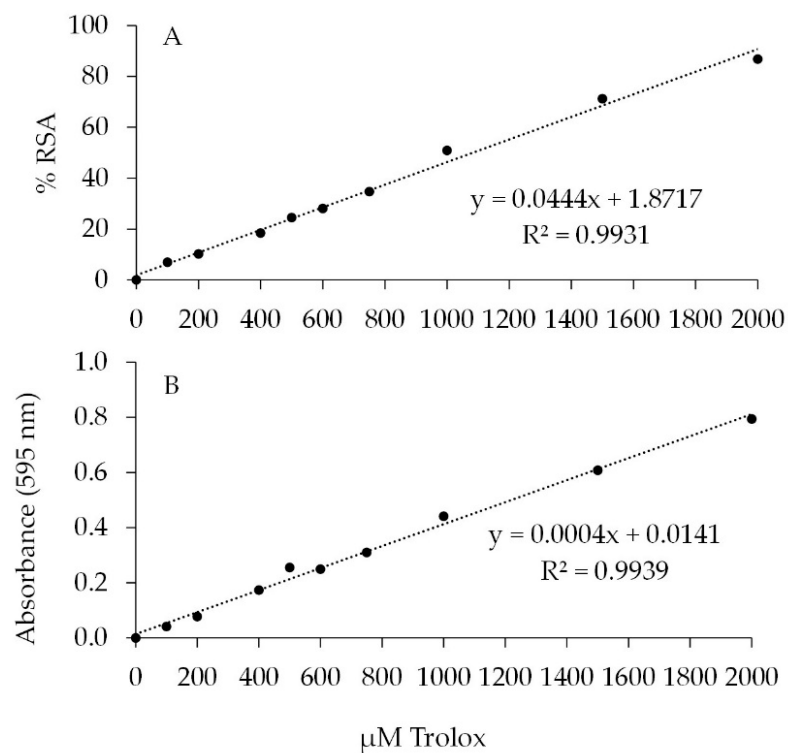

**Figure S1.** Calibration curve and equation of DPPH test (A) and FRAP method (B). Relative antioxidant activity was expressed as percentage of absorbance decrease and subsequently calculated to equivalent content of Trolox.
